# Supplementary material for: Prognostic Value of Low-Cost White Blood Cell Indices and Procalcitonin for Mortality in Rwandan Sepsis Patients: A Prospective Intensive Care Unit Study
Source: Research Square preprint supplement (doi:10.21203/rs.3.rs-7348819/v1), 2025-08-13
Supplement: Supplementary file 1 [file 2e2bbb8c499c8a4ccec07e97.docx]

**Table S1: Sensitivity analysis of Cox regression models**

|  | (1) | (2) | (3) | (4) | (5) | (6) | (7) | (8) |
| --- | --- | --- | --- | --- | --- | --- | --- | --- |
|  | _t | _t | _t | _t | _t | _t | _t | _t |
| 1.Sex - female | ref | ref | ref | ref | ref | ref | ref | ref |
|  |  |  |  |  |  |  |  |  |
| 2.Sex - male | 0.195 | 0.261 | 0.256 | 0.264 | 0.225 | 0.254 | 0.147 | 0.176 |
|  | [-0.336,0.727] | [-0.280,0.802] | [-0.281,0.792] | [-0.269,0.798] | [-0.331,0.781] | [-0.293,0.802] | [-0.416,0.709] | [-0.385,0.737] |
|  |  |  |  |  |  |  |  |  |
| 1. Young Adults (18–25) | ref | ref | ref | ref | ref | ref | ref | ref |
|  |  |  |  |  |  |  |  |  |
| 2.Middle-aged Adults (26–40) | 0.042 | -0.059 | 0.411 | 0.343 | 0.451 | 0.358 | 0.461 | 0.389 |
|  | [-0.865,0.950] | [-0.979,0.862] | [-0.507,1.329] | [-0.574,1.260] | [-0.486,1.389] | [-0.578,1.295] | [-0.478,1.399] | [-0.540,1.318] |
|  |  |  |  |  |  |  |  |  |
| 3.Older Adults (41–55) | 0.179 | 0.037 | 0.558 | 0.479 | 0.627 | 0.505 | 0.639 | 0.586 |
|  | [-0.728,1.086] | [-0.891,0.965] | [-0.369,1.484] | [-0.440,1.399] | [-0.360,1.614] | [-0.471,1.481] | [-0.356,1.633] | [-0.401,1.573] |
|  |  |  |  |  |  |  |  |  |
| 4.Elderly (56 and above) | 0.282 | 0.245 | 0.586 | 0.512 | 0.607 | 0.521 | 0.681 | 0.653 |
|  | [-0.589,1.153] | [-0.627,1.116] | [-0.295,1.467] | [-0.365,1.388] | [-0.281,1.494] | [-0.363,1.406] | [-0.216,1.577] | [-0.242,1.547] |
|  |  |  |  |  |  |  |  |  |
| PCT |  | 0.007 |  |  | -0.002 | -0.001 | -0.003 | -0.002 |
|  |  | [-0.000,0.015] |  |  | [-0.011,0.007] | [-0.009,0.008] | [-0.013,0.006] | [-0.011,0.007] |
|  |  |  |  |  |  |  |  |  |
| WBCNeut |  |  | 0.076*** |  | 0.080*** |  | 0.066** |  |
|  |  |  | [0.046,0.106] |  | [0.045,0.115] |  | [0.025,0.107] |  |
|  |  |  |  |  |  |  |  |  |
| TotalWBC |  |  |  | 0.062*** |  | 0.063*** |  | 0.060** |
|  |  |  |  | [0.036,0.087] |  | [0.033,0.093] |  | [0.020,0.099] |
|  |  |  |  |  |  |  |  |  |
| Monocytes |  |  |  |  |  |  | 0.071 | -0.014 |
|  |  |  |  |  |  |  | [-0.108,0.250] | [-0.223,0.195] |
|  |  |  |  |  |  |  |  |  |
| Neutrophil to lymphocyte ratio (NLR) |  |  |  |  |  |  | 0.016 | 0.018 |
|  |  |  |  |  |  |  | [-0.005,0.037] | [-0.002,0.039] |
| Log-likelihood | -239.272 | -237.678 | -228.354 | -229.934 | -228.275 | -229.922 | -227.289 | -227.946 |
| N | 112.000 | 112.000 | 112.000 | 112.000 | 112.000 | 112.000 | 112.000 | 112.000 |

We conducted a sensitivity analysis to evaluate the robustness and consistency of Cox regression models under varying combinations of covariates, particularly focusing on WBC markers. All models included sex and age group as adjustment variables, though these demographic covariates consistently showed non-significant associations with survival (i.e., hazard ratios with 95% confidence intervals crossing zero), suggesting limited predictive utility in this context.

In contrast, models incorporating neutrophil count (WBCNeut) or total white blood cell count (total WBC) demonstrated statistically significant positive associations with increased hazard of death, indicating that elevated levels of these markers may be useful indicators of poor prognosis. Specifically, WBCNeut was significantly associated with mortality in Models 3 and 7 (HR per unit increase ≈ 1.08 and 1.07, respectively), while total WBC showed similar associations in Models 4, 6, and 8.

The combination models (Models 5-8), which paired Procalcitonin (PCT) with either WBCNeut or total WBC, generally achieved better model fit, as reflected in more favourable log-likelihood values (ranging from −227.29 to −229.92). Among these, Model 7 (PCT + WBCNeut + Monocytes + NLR) had the best overall fit (log-likelihood = −227.29), suggesting potential for improved predictive performance. The results were consistent with findings from the ROC curve analysis, where the same models (particularly Model 7 and Model 8) demonstrated higher AUC values (~67–70%) across days 6, 10, and 15, indicating moderate-to-good discrimination. The ROC curves also showed a clear separation from the diagonal, reflecting a meaningful trade-off between sensitivity and specificity.
